# Supplementary material for: In situ preparation of high-performance flexible copper halide scintillation films for X-ray imaging
Source: Royal Society of Chemistry journal article supplement (doi:10.1039/d5tc03258j), 2025-11-14
Supplement: d5tc03258j1.pdf [file d5tc03258j1.pdf]

Supplementary Information (SI) for Journal of Materials Chemistry C. This journal is ©The Royal Society of Chemistry 2025

## **In-situ Preparation of High-Performance Flexible Copper Halide Scintillation Films for X-ray imaging**

Xianming Cai, <sup>a</sup> Xinxin Miao, <sup>a</sup> Muhammad Bilal, <sup>a</sup> Congxiao Wu, <sup>b</sup> Ruoyu Li, <sup>a</sup> Ahmed Uddin, <sup>a</sup> Jing Li, <sup>a</sup> Jun Pan<sup>\*a</sup>

<sup>a</sup> College of Materials Science and Engineering, Science and Education Integration College of Energy and Carbon Neutralization, Zhejiang University of Technology,

Hangzhou 310014, China

E-mail: [panjun0123@zjut.edu.cn](mailto:panjun0123@zjut.edu.cn)

<sup>b</sup> College of Materials Science and Engineering, Nanjing University of Science and Technology,  
Nanjing 210094, China

**(a)**

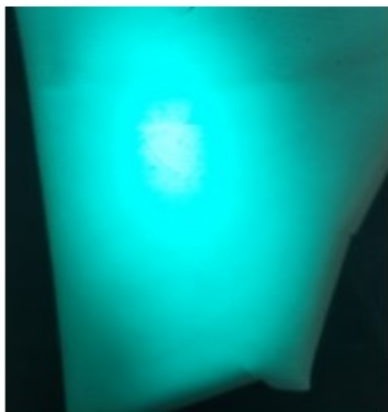

**(b)**

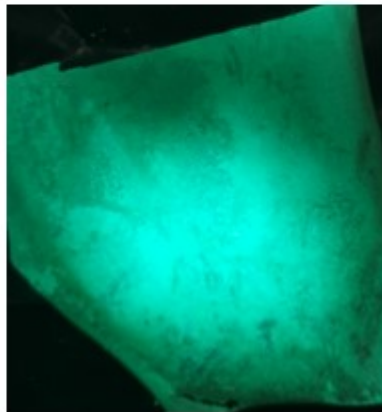

**Fig. S1.** Photographs of films prepared (a) with and (b) without Tween 80.

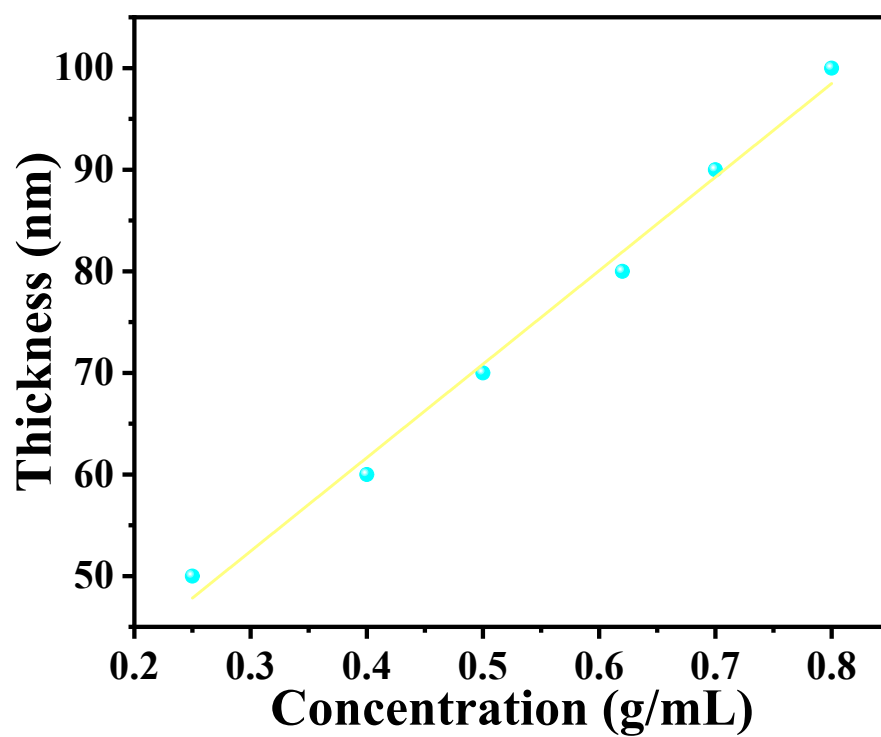

**Fig. S2.** The relationship between film thickness and solution concentration of  $(C_{19}H_{18}P)_2CuI_3@PMMA$ .

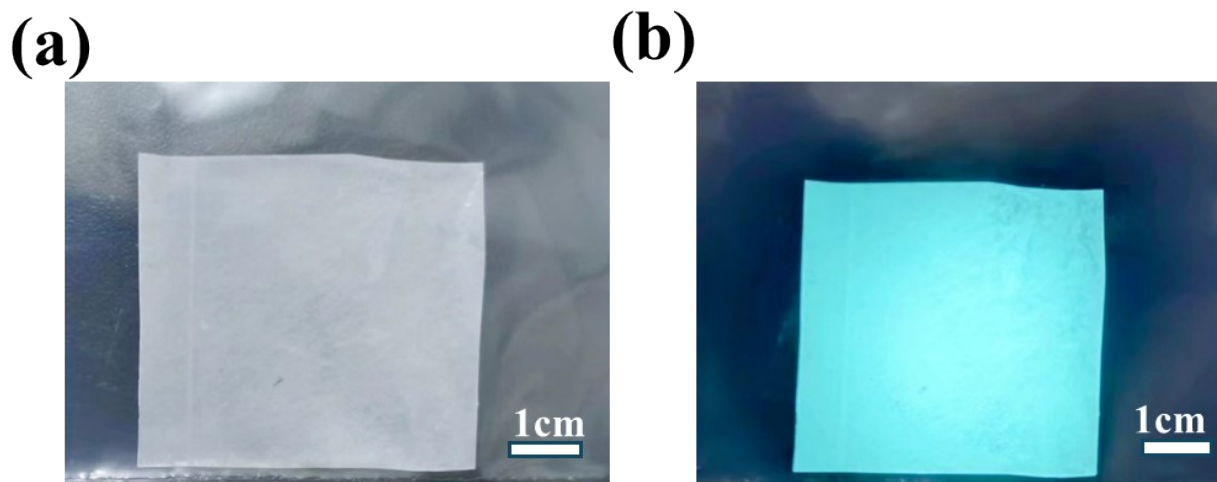

**Fig. S3.** Photographs of the in-situ grown  $(C_{19}H_{18}P)_2CuI_3@PMMA$  film: (a) under ambient light and (b) under 365 nm irradiation.

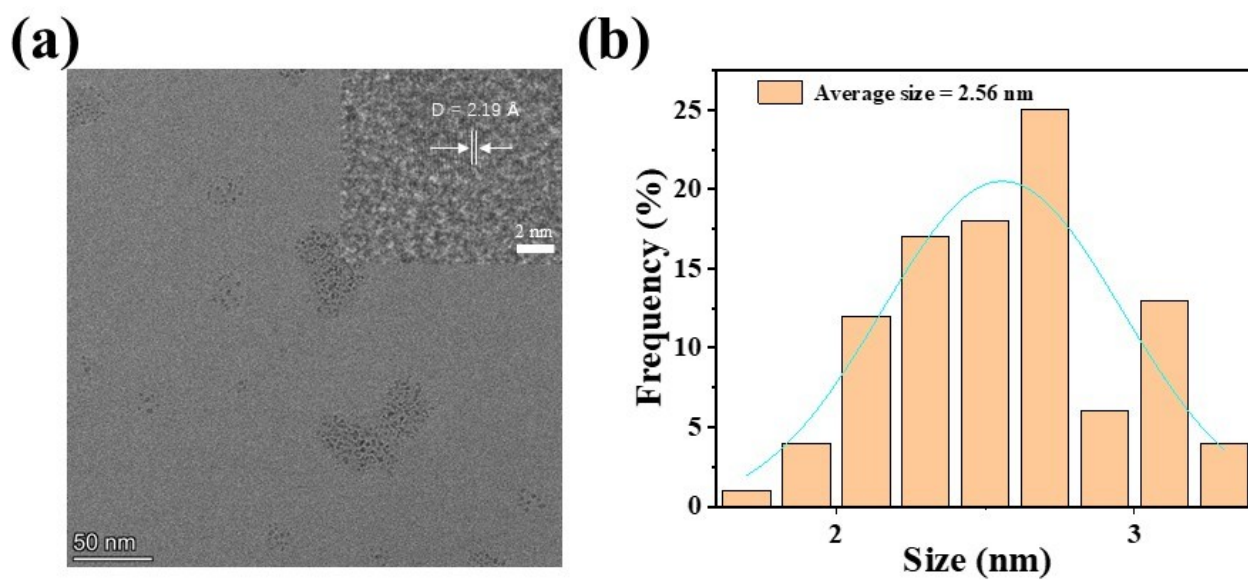

**Fig. S4.** (a) TEM image of the diluted precursor solution (mixture of CuI, C<sub>19</sub>H<sub>18</sub>IP, H<sub>3</sub>PO<sub>2</sub> and PMMA in DMF), the inset shows the corresponding high-magnification TEM image with an interplanar distance of 2.19 Å. (b) Size distribution of (C<sub>19</sub>H<sub>18</sub>P)<sub>2</sub>CuI<sub>3</sub> in PMMA matrix, the average size was 2.56 nm.

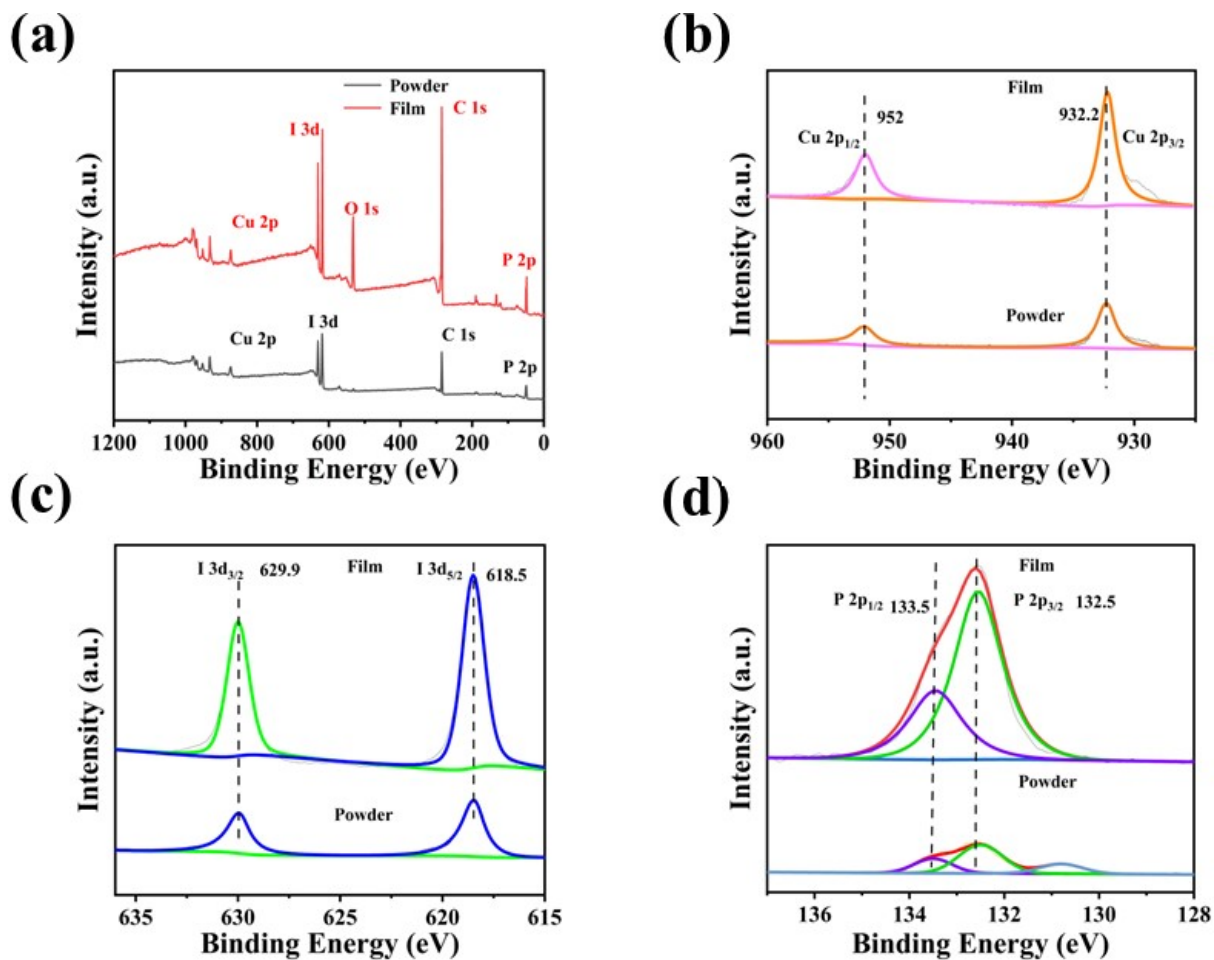

**Fig. S5.** XPS spectra of  $(C_{19}H_{18}P)_2CuI_3$  and  $(C_{19}H_{18}P)_2CuI_3@PMMA$  film, peaks at 932.2 eV and 952 eV corresponding to Cu 2p<sub>3/2</sub> and Cu 2p<sub>1/2</sub> orbits; peaks at 618.5 eV and 629.9 eV corresponding to I 3d<sub>5/2</sub> and I 3d<sub>3/2</sub> orbits; peaks at 132.5 eV and 133.5 eV corresponding to P 2p<sub>3/2</sub> and P 2p<sub>1/2</sub> orbits (all the peak positions were corrected according to C1s orbit located at 248.8 eV).

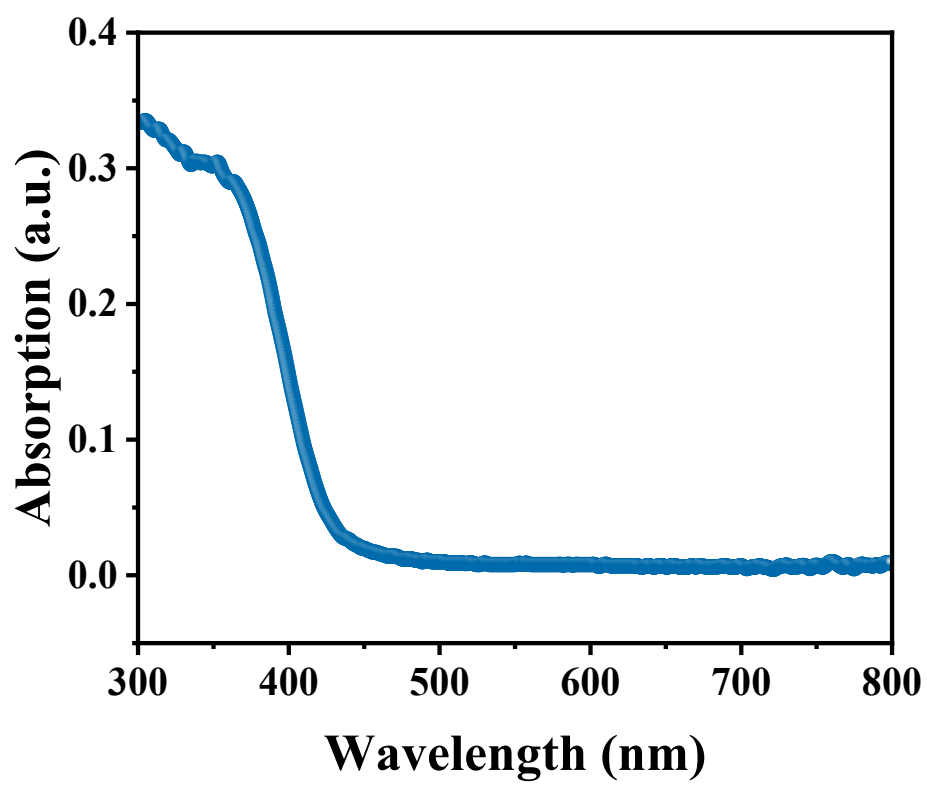

**Fig. S6.** UV absorption spectrum of  $(C_{19}H_{18}P)_2CuI_3@PMMA$  film.

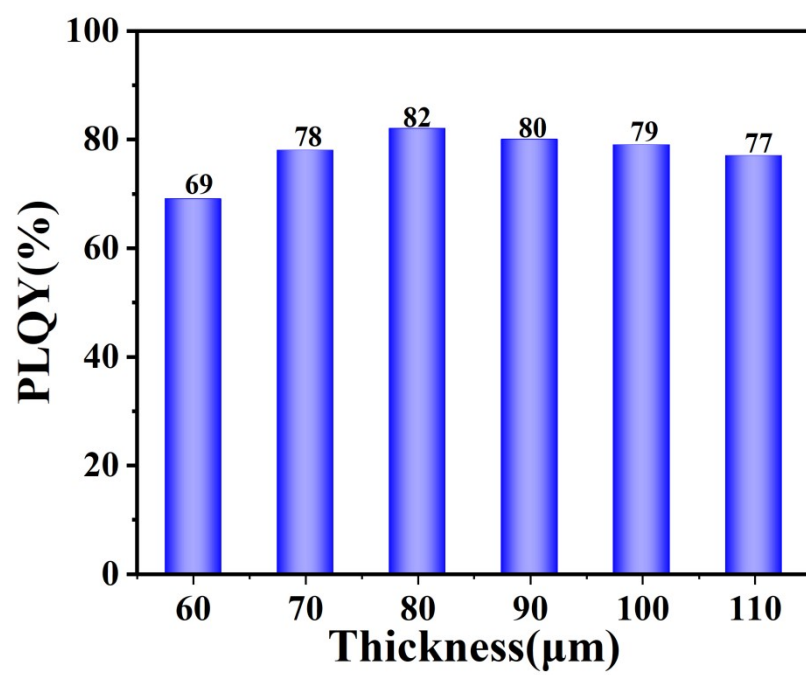

**Fig. S7.** PLQY of  $(C_{19}H_{18}P)_2CuI_3@PMMA$  films with different thicknesses.



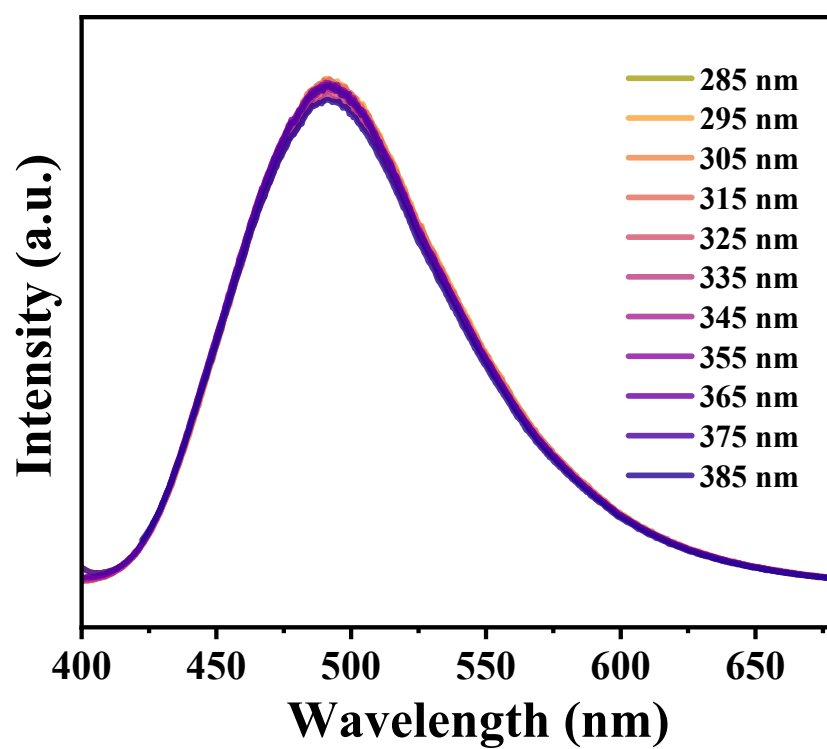

**Fig. S8.** PL intensity of  $(C_{19}H_{18}P)_2CuI_3@PMMA$  film under different excitation wavelengths from 285 nm to 385 nm.

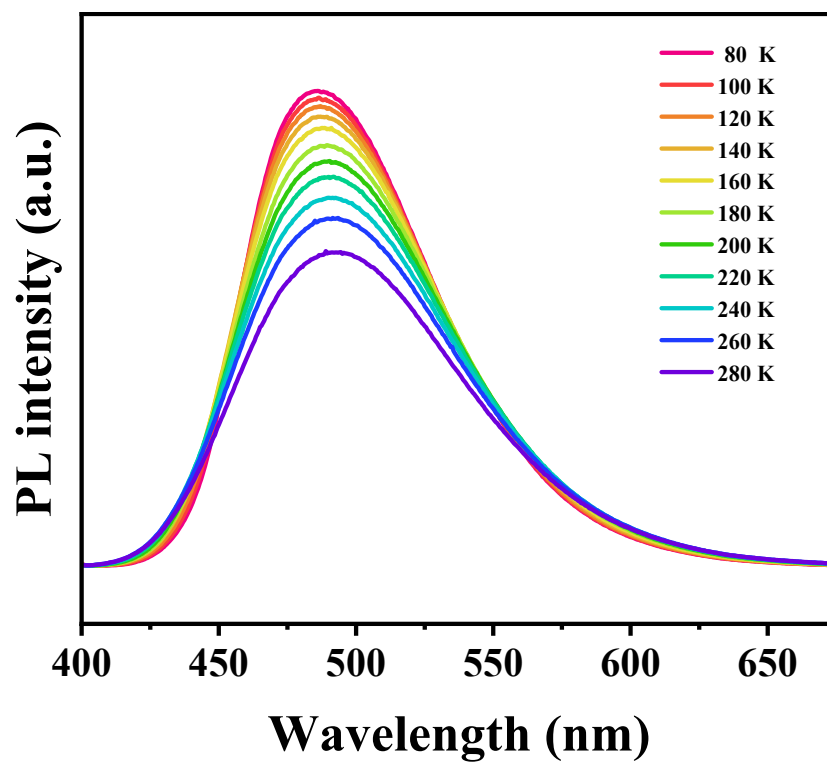

**Fig. S9.** Temperature-dependent PL spectra of  $(C_{19}H_{18}P)_2CuI_3@PMMA$  film in the range of 80–280 K.

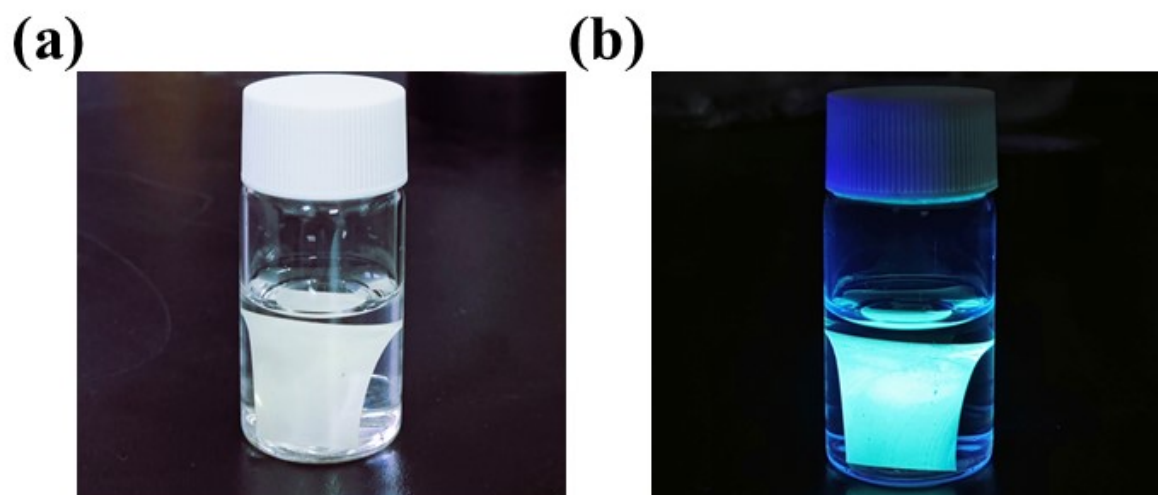

**Fig. S10.** Photos of the  $(\text{C}_{19}\text{H}_{18}\text{P})_2\text{CuI}_3@\text{PMMA}$  film soaked in water: (a) under natural light and (b) 365 nm ultraviolet light.

**(a)**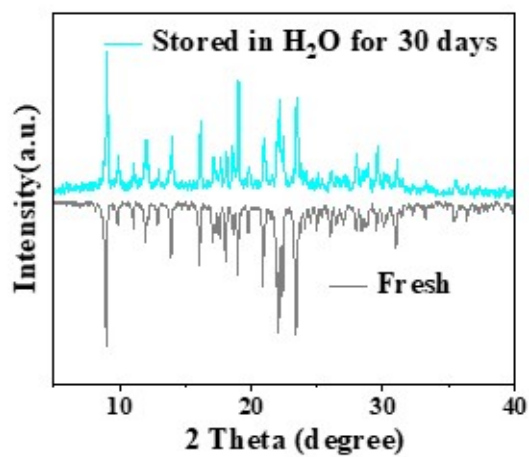**(b)**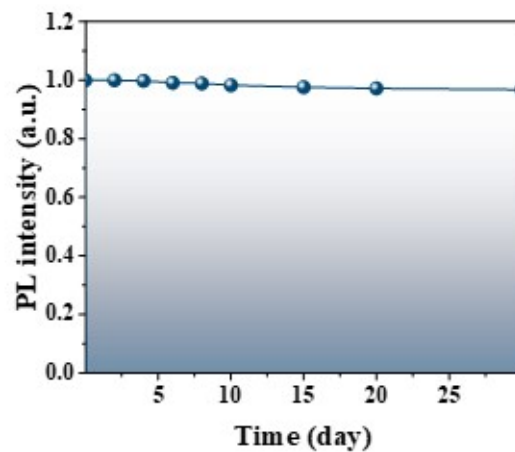

**Fig. S11.** (a) XRD patterns of freshly grown  $(C_{19}H_{18}P)_2CuI_3@PMMA$  film and after soaked in water for 30 days. (b) Variation in PL emission intensity of  $(C_{19}H_{18}P)_2CuI_3@PMMA$  film after being soaked in water for 30 days.

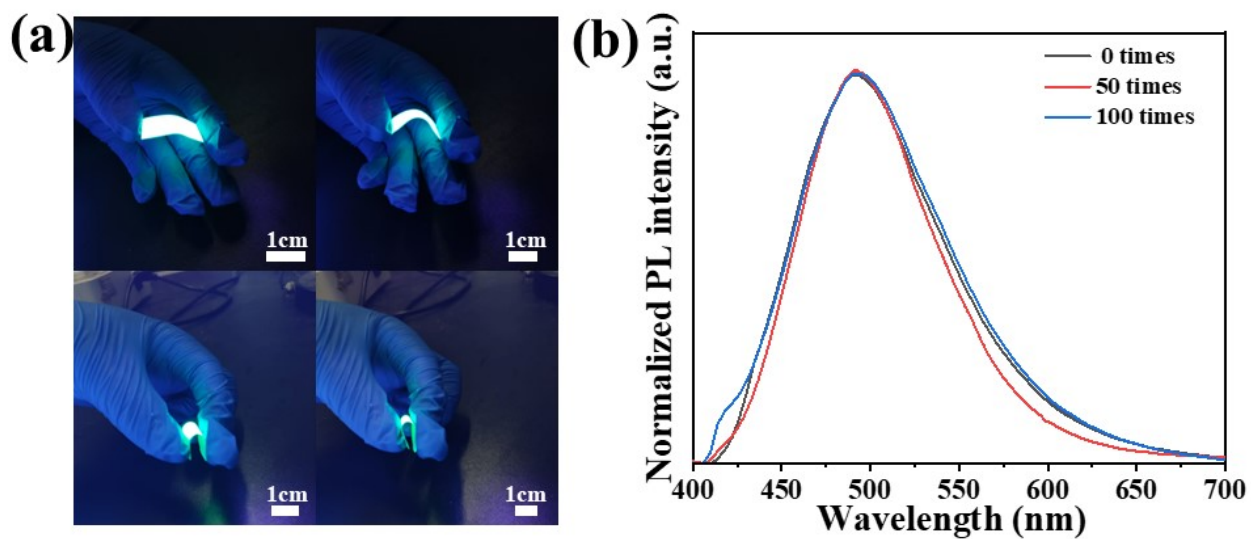

**Fig. S12.** (a) Photographs of  $(\text{C}_{19}\text{H}_{18}\text{P})_2\text{CuI}_3@\text{PMMA}$  scintillation film at different bending states under UV 365 nm. (b) Normalized PL spectra of  $(\text{C}_{19}\text{H}_{18}\text{P})_2\text{CuI}_3@\text{PMMA}$  scintillation film at different numbers of bending.

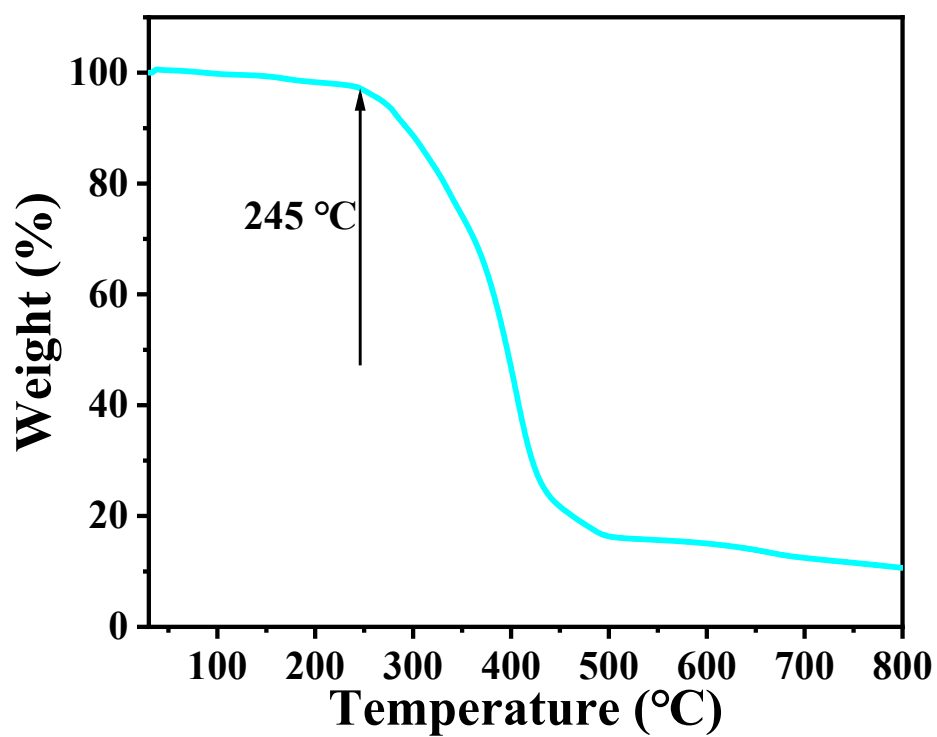

**Fig. S13.** Thermogravimetric curve of the  $(\text{C}_{19}\text{H}_{18}\text{P})_2\text{CuI}_3@\text{PMMA}$  film.

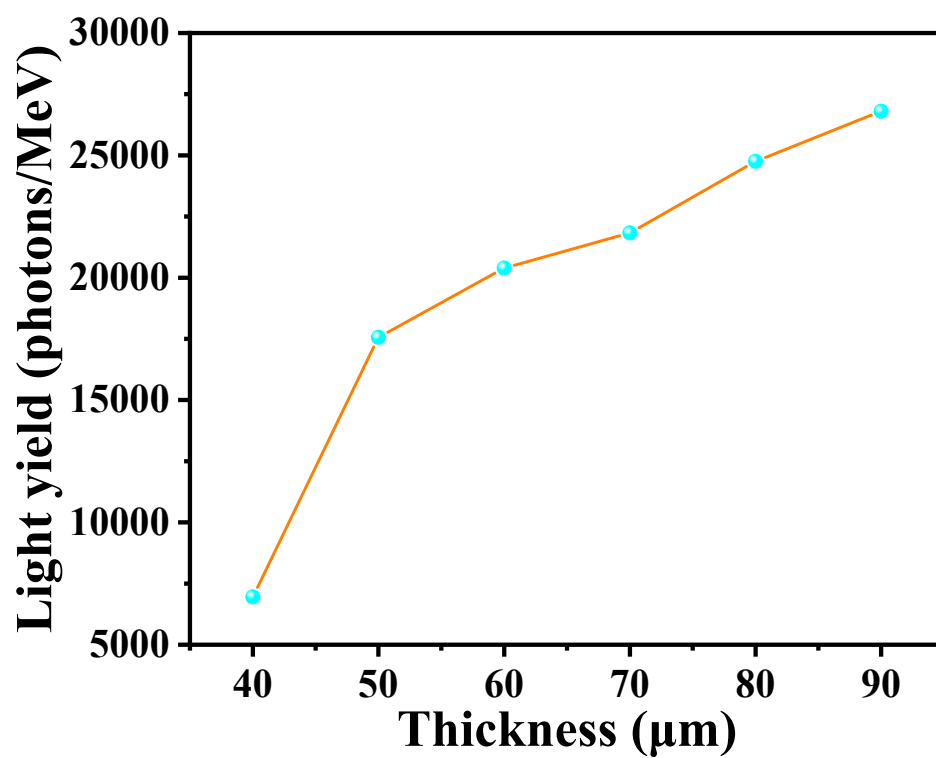

**Fig. S14.** Relationship between light yield and scintillator film thickness of  $(C_{19}H_{18}P)_2CuI_3@PMMA$ .

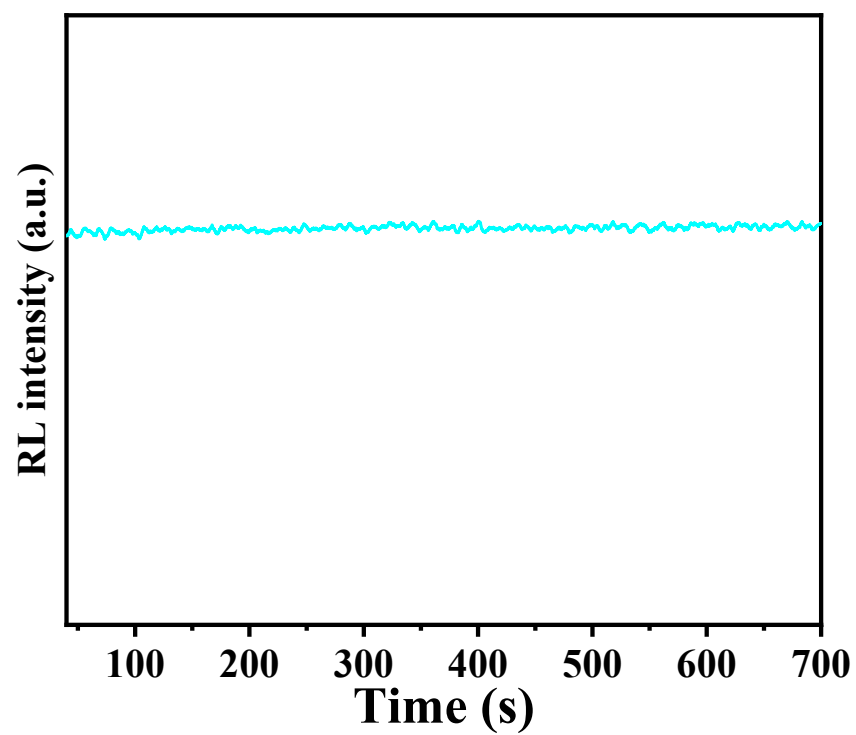

**Fig. S15.** Changes in RL intensity of  $(\text{C}_{19}\text{H}_{18}\text{P})_2\text{CuI}_3@\text{PMMA}$  scintillator film under 10 min continuous X-ray irradiation at a dose rate of  $1.221 \text{ mGy s}^{-1}$ .
